# Supplementary material for: In silico modeling enables greener analytical and preparative chromatographic methods
Source: Royal Society of Chemistry journal article supplement (doi:10.1039/d4gc04300f), 2024-10-23
Supplement: d4gc04300f1.xlsx [file d4gc04300f1.xlsx]

## Sheet: Data
Tg	Temp	Run Time		Replication data for "In Silico Modeling Enables Greener Analytical and Preparative Chromatographic Methods"
1	80	4.84		Figure 1. See the expirnmental section of the manuscript for more details. Run times and resolution map were
1	70	5.89		aquired from LC Simulator (ACD Labs).
1	60	7.48
1	50	9.98
1	40	14.02
1	30	20.74
1	20	32.31
1	10	52.97
3	80	6.23
3	70	7.31
3	60	8.94
3	50	11.48
3	40	15.55
3	30	22.3
3	20	33.91
3	10	54.6
5	80	7.61
5	70	8.74
5	60	10.41
5	50	12.98
5	40	17.09
5	30	23.87
5	20	35.51
5	10	56.22
7	80	8.99
7	70	10.16
7	60	11.87
7	50	14.48
7	40	18.62
7	30	25.44
7	20	37.1
7	10	57.85
9	80	10.75
9	70	11.59
9	60	13.34
9	50	15.98
9	40	20.16
9	30	27.01
9	20	38.7
9	10	59.47
11	80	12.75
11	70	13.01
11	60	14.8
11	50	17.48
11	40	21.69
11	30	28.57
11	20	40.3
11	10	61.1
13	80	14.75
13	70	14.75
13	60	16.26
13	50	18.98
13	40	23.23
13	30	30.14
13	20	41.89
13	10	62.72
15	80	16.75
15	70	16.75
15	60	17.73
15	50	20.78
15	40	24.76
15	30	31.71
15	20	43.49
15	10	64.35
17	80	18.75
17	70	18.75
17	60	19.19
17	50	21.98
17	40	26.3
17	30	33.27
17	20	45.09
17	10	65.98
19	80	20.75
19	70	20.75
19	60	20.75
19	50	23.49
19	40	27.83
19	30	34.84
19	20	46.69
19	10	67.6
